# Supplementary material for: Presenilin 2 N141I mutation induces hyperactive immune response through the epigenetic repression of REV-ERBα
Source: Research Square preprint supplement (doi:10.21203/rs.3.rs-102825/v1), 2020-11-18
Supplement: Supplementary file 1 [file 041b9b18ed6cc57719008836.docx]

**
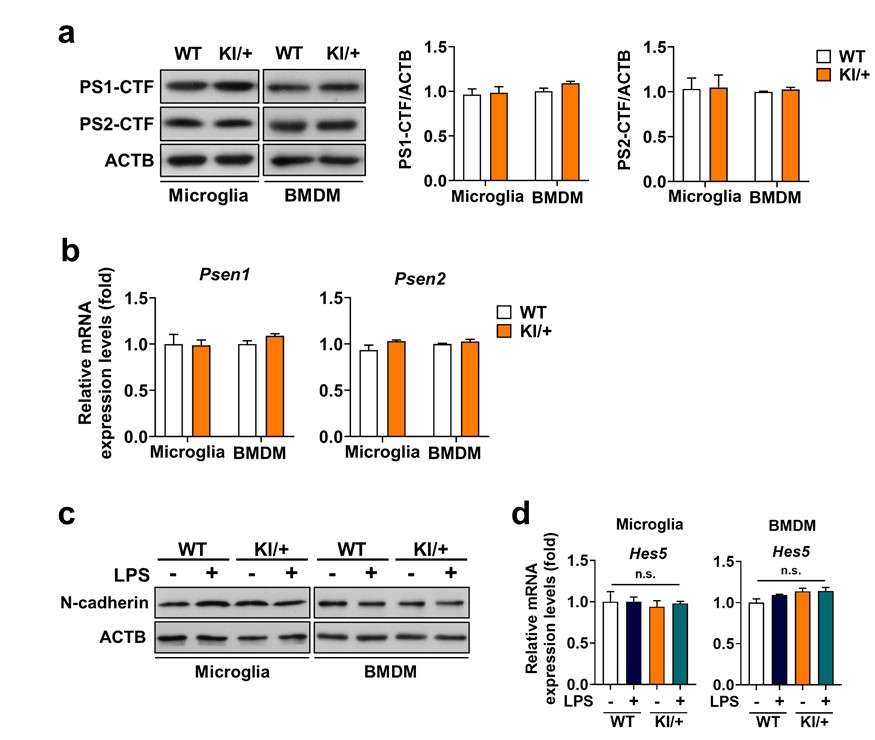
**

**Supplementary Fig. 1** *Psen2* N141I mutation does not change the expression levels of *Psen1* and *Psen2*, or γ-secretase activity of PSEN2. **a** Western blot analysis of the levels of carboxy-terminal fragments (CTF) of PSEN1 and PSEN2 in primary microglia and BMDM from WT and KI/+ mice. Graphs show quantification of the protein levels (*n* = 3). **b** Relative mRNA levels of *Psen1* and *Psen2* measured by qRT-PCR in primary microglia and BMDM from WT and KI/+ mice (*n* = 4). **c**, **d** Representative blots of N-cadherin expression level (**c**) and relative mRNA expression levels of *Hes5* (*n* = 3) (**d**) in primary microglia and BMDM from WT and KI/+ mice. mRNA levels were normalized to *Actb*. The blots shown are representative of 3 experiments with similar results. All data are mean ± SEM. n.s., not significant.

**
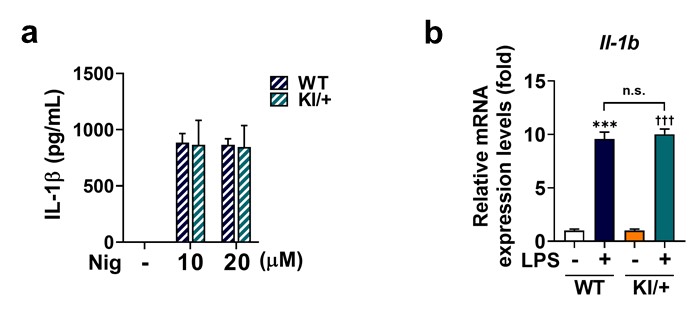
**

**Supplementary Fig. 2** *Psen2* N141I mutation does not affect NLRP3 inflammasome activation and *IL-1b* expression. **a** ELISA of IL-1β in supernatants from LPS-primed WT and KI/+ microglia after nigericin (10 and 20 μM) treatment (*n* =3). Microglia were primed with LPS (1 μg/ mL) for 3 h, followed by nigericin treatment for 40 min. **b** Relative mRNA levels of *IL-1b* in WT and KI/+ microglia after LPS treatment for 12 h. The mRNA levels were normalized to *Actb* (*n* = 3). All data are mean ± SEM. n.s., not significant. ****p* < 0.001 vs. untreated WT control. †††*p* < 0.001 vs. untreated KI/+ control.

**
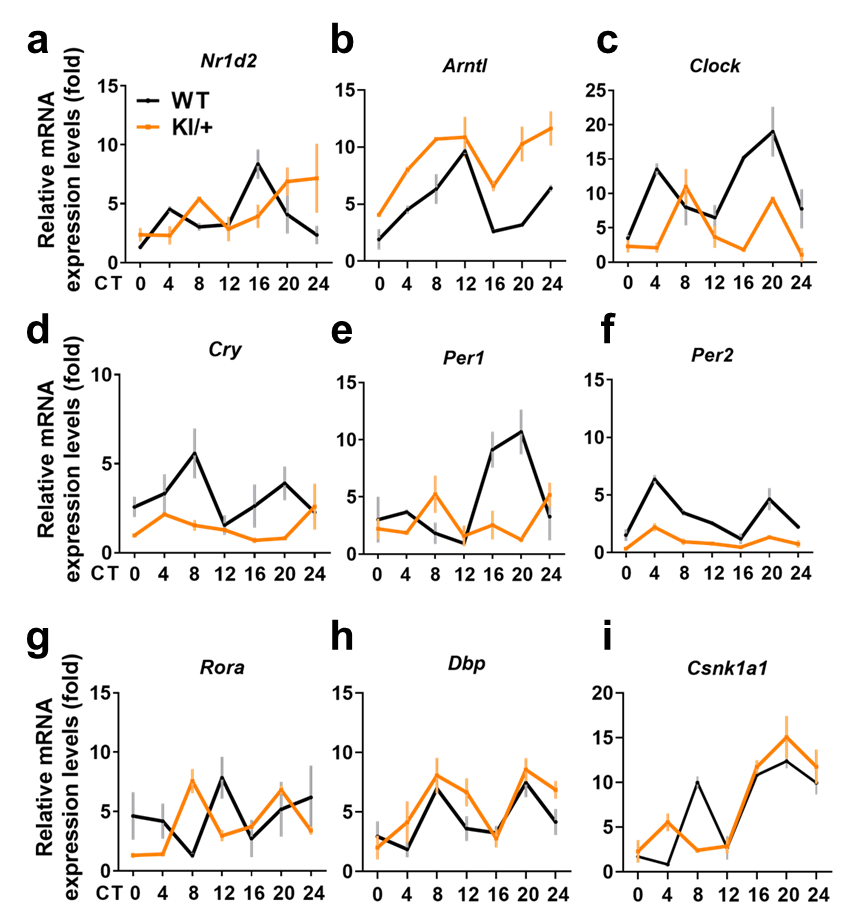
**

**Supplementary Fig. 3.** Transcript abundance of the indicated circadian clock genes at different circadian times (CT). **a-i** Microglia were synchronized with dexamethasone (DEX, 100 nM) treatment for 2 h and harvested every 4 h for RNA extraction and qPCR (*n* = 4). mRNA levels were normalized to *Actb*.


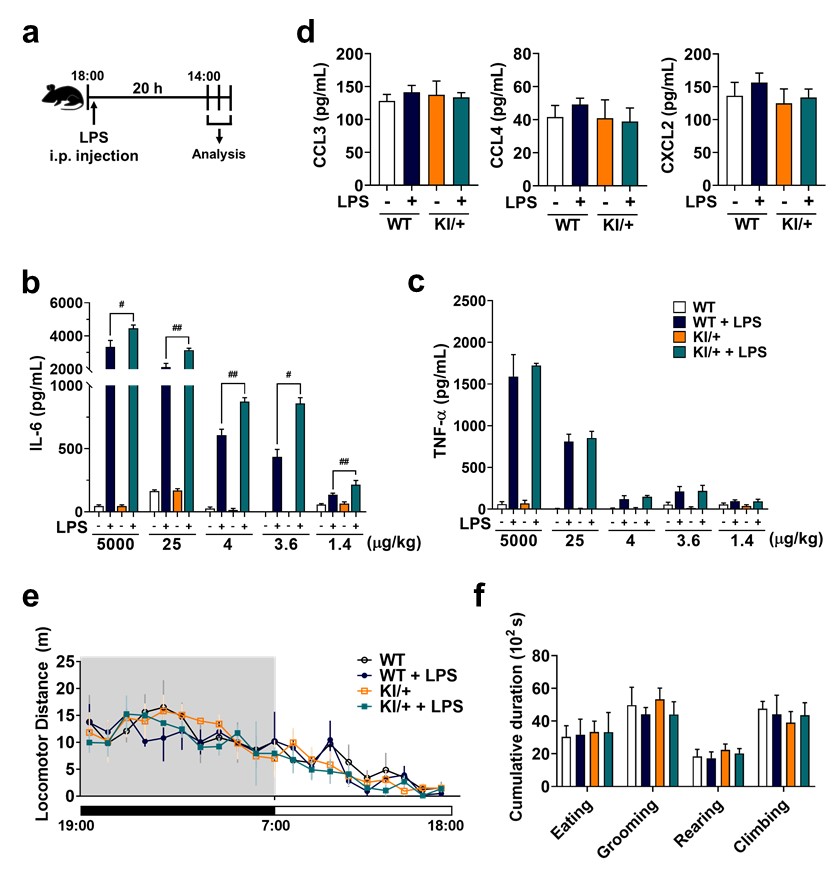


**Supplementary Fig. 4** *Psen2*N141I/+ mice show normal locomotor activity and behaviour, but produce more IL-6 than TNF-α in response to LPS. **a** Schematic illustration of the experimental schedule. **b**, **c** ELISA of IL-6 (**b**) and TNF-α (**c**) in blood serum from WT and KI/+ mice i.p. injected with various doses of LPS (*n* = 9). LPS induced more IL-6 secretion in KI/+ mice than in WT in a dose-dependent manner. **d** ELISA of CCL3, CCL4, and CXCL2 in blood serum from WT and KI/+ mice 20 h after i.p. injection of LPS (0.35 μg/kg). **e**, **f** Analyses of locomotor activity and home cage behaviour of WT and KI/+ mice 20 h after i.p. injection of LPS (0.35 μg/kg). WT and KI/+ mice showed normal locomotor activity (**e**) and general behaviour (**f**; eating, grooming, rearing, and climbing), when monitored in LABORAS cages for 24 h (*n* = 8). All data are mean ± SEM. #*p* < 0.05, ##*p* < 0.01 and ###*p* < 0.001 for the indicated comparisons.

**
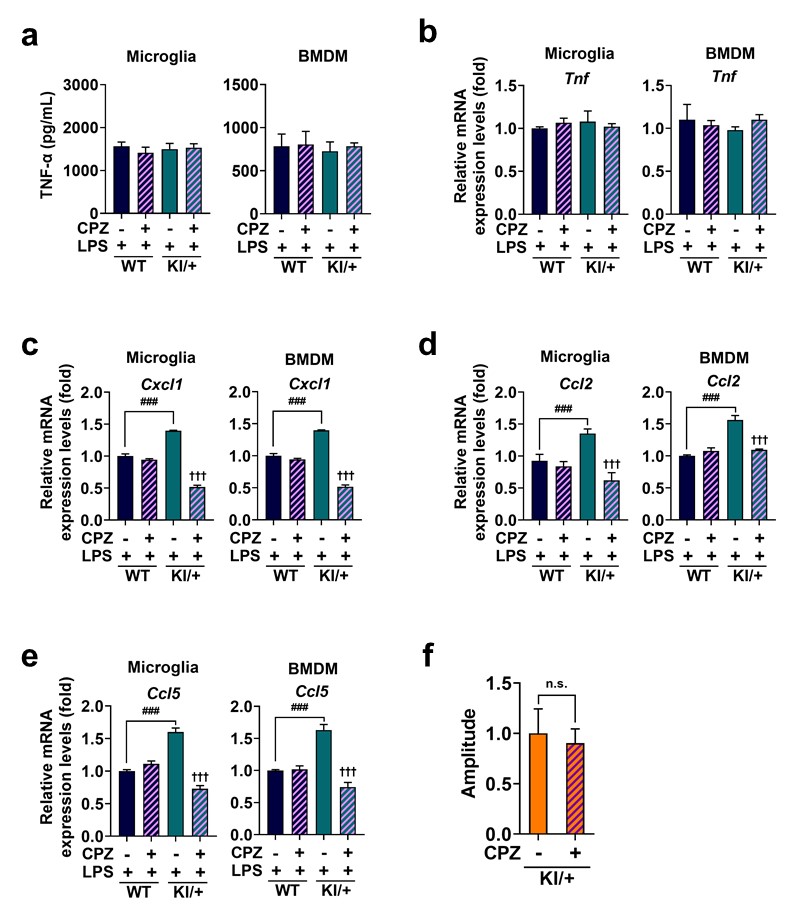
**

**Supplementary Fig. 5** Chlorpromazine selectively reduced expression of clock-controlled cytokines, but does not affect circadian amplitude in *Psen2*N141I/+ microglia and BMDM. **a, b** Secretion (**a**) and mRNA level (**b**) of TNF-α in microglia (0.5 μM, *n* = 4) and BMDM (1 μM, *n* = 3) treated with CPZ for 1 h prior to LPS for 12 h. **c-e** mRNA levels of clock-controlled cytokines in microglia (*n* = 4) and BMDM (*n* = 3) treated with CPZ for 1 h prior to LPS for 12 h. **f** Circadian amplitude were analysed using representative bioluminescence recordings of CPZ-treated KI/+ microglia (*n* = 4).Data are mean ± SEM. n.s., not significant. †††*p* < 0.001 vs. untreated KI/+ control. ###*p* < 0.001 for the indicated comparisons.
